# Supplementary material for: NMR monitoring of the SELEX process to confirm enrichment of structured RNA
Source: PubMed Central journal article supplement (PMC5428055; doi:10.1038/s41598-017-00273-x), 2017-03-21
Supplement: 41598_2017_273_MOESM1_ESM.pdf [file 41598_2017_273_MOESM1_ESM.pdf]

## Supplementary Information

### NMR monitoring of the SELEX process to confirm enrichment of structured RNA

Ryo Amano<sup>1</sup>, Kazuteru Aoki<sup>2</sup>, Shin Miyakawa<sup>2</sup>, Yoshikazu Nakamura<sup>2,3</sup>, Tomoko Kozu<sup>4</sup>, Gota Kawai<sup>1</sup>, and Taiichi Sakamoto<sup>1\*</sup>

<sup>1</sup>Department of Life and Environmental Sciences, Faculty of Engineering, Chiba Institute of Technology, Chiba 275-0016, Japan

<sup>2</sup>Ribomic Inc., Tokyo 108-0071, Japan

<sup>3</sup>Department of Basic Medical Sciences, Institute of Medical Science, University of Tokyo, Tokyo 108-8639, Japan

<sup>4</sup>Research Institute for Clinical Oncology, Saitama Cancer Center, Saitama 362-0806, Japan

\* taiichi.sakamoto@p.chibakoudai.jp

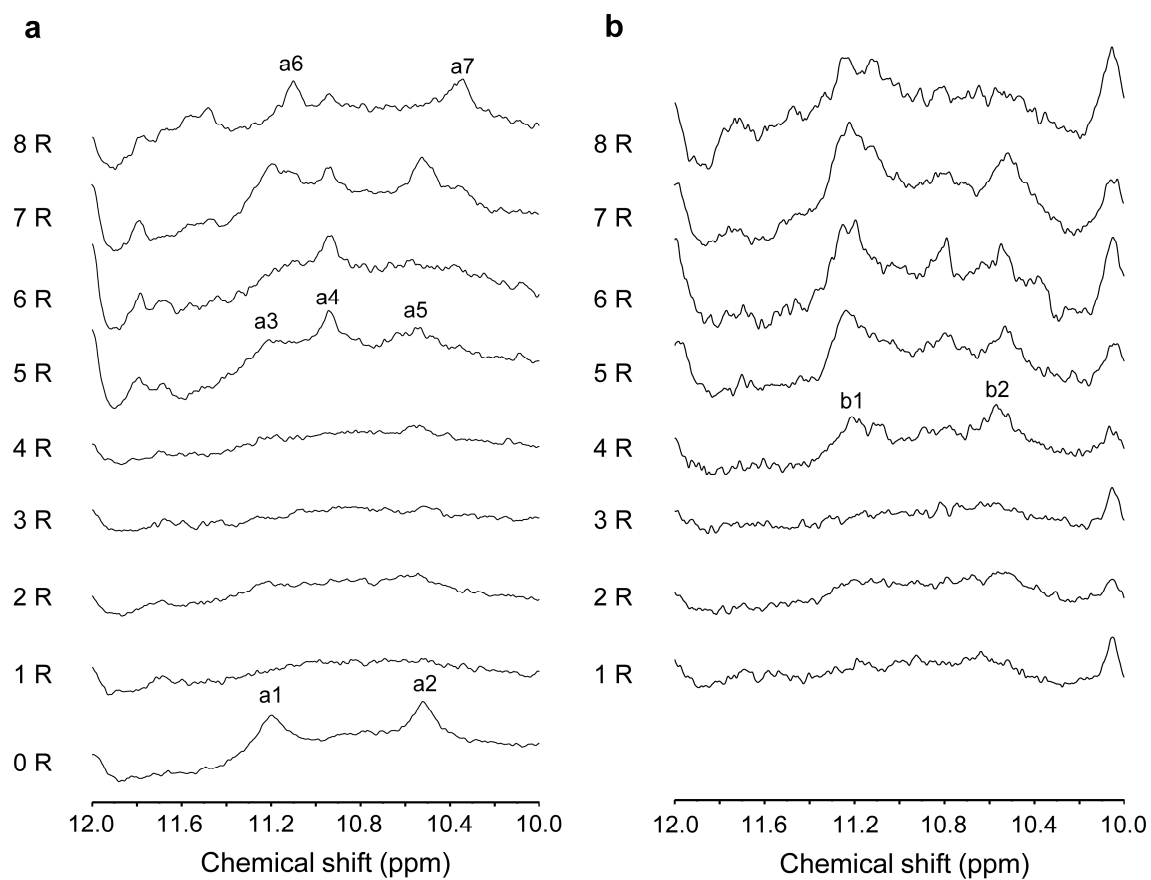

**Supplementary Figure S1. 1D imino proton spectra (10–12 ppm) of RNA pools in the absence and presence of RD.** 1D imino proton spectra of 0–8R RNA pools from SELEX in the absence (**a**) and presence (**b**) of RD.

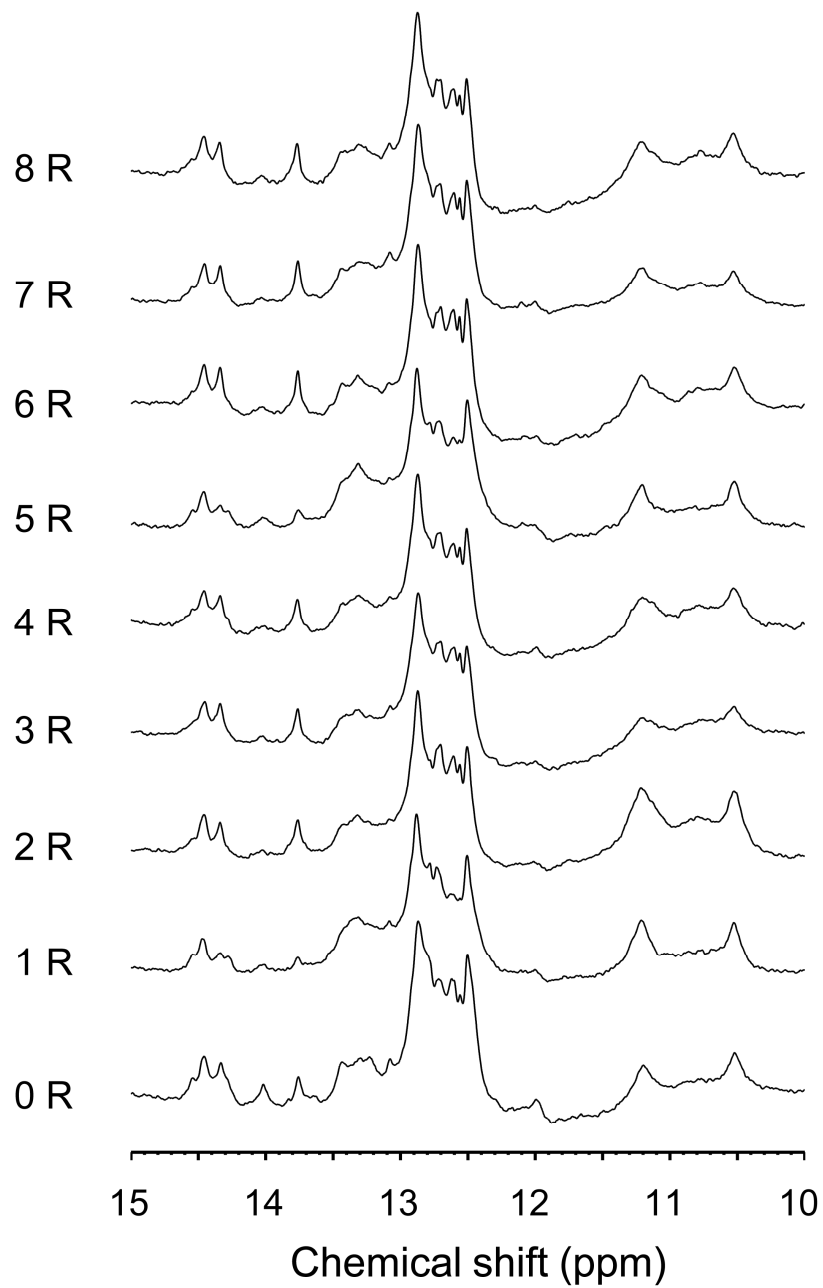

**Supplementary Figure S2. 1D imino proton spectra of RNA pools from Neutral SELEX.**

1D imino proton spectra of 0–8R RNA pools from Neutral SELEX in the absence of RD.

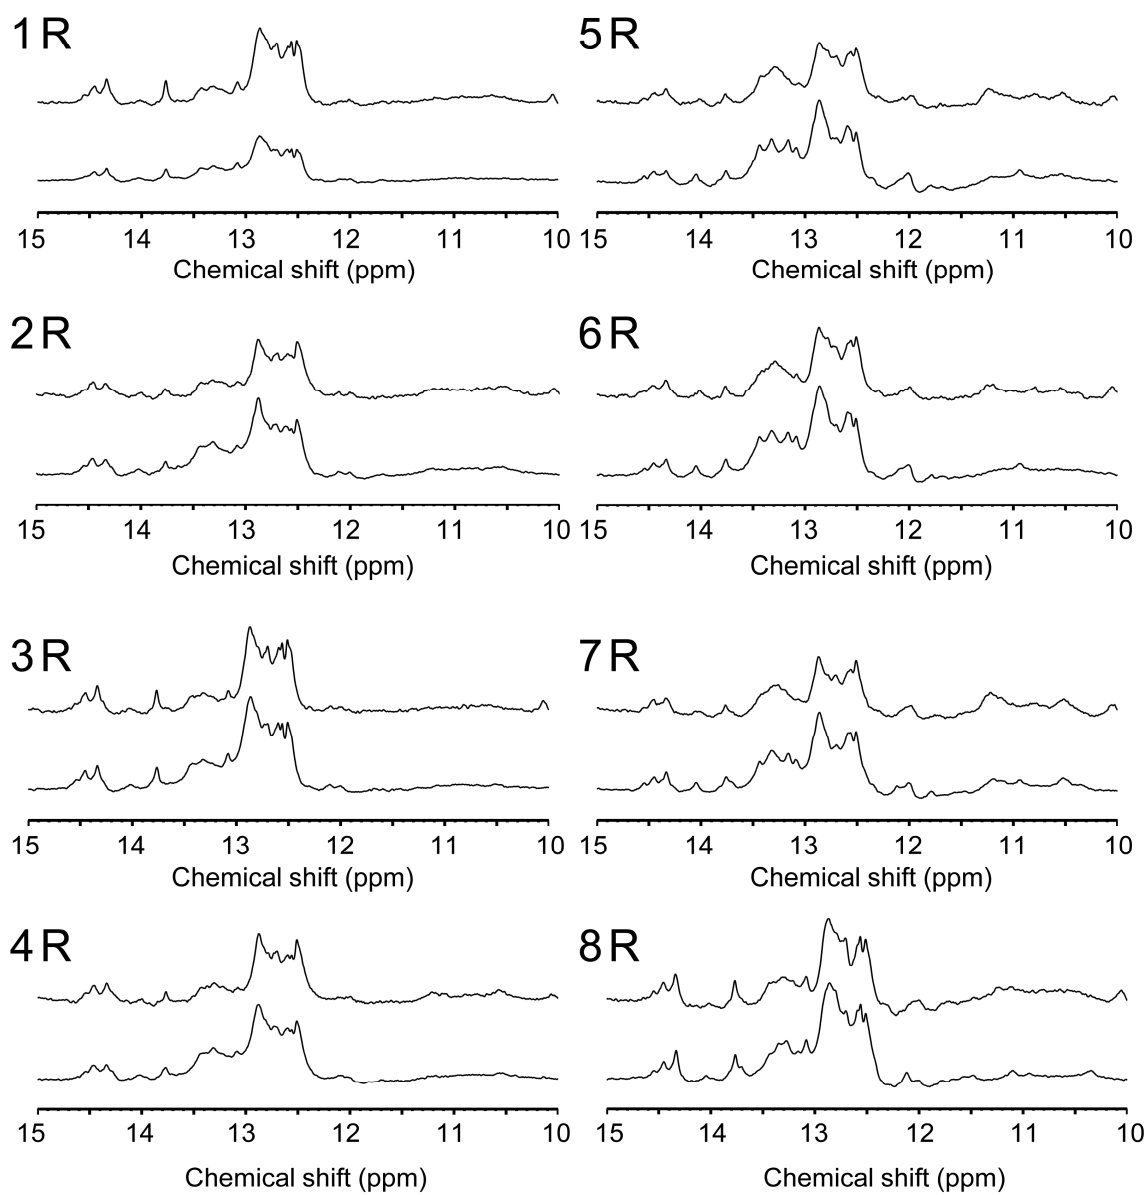

**Supplementary Figure S3. Comparison of 1D imino proton spectra of RNA pools from SELEX in the absence and presence of RD.** 1D imino proton spectra of 0–8R RNA pools from SELEX in the absence (bottom) and presence (top) of RD.

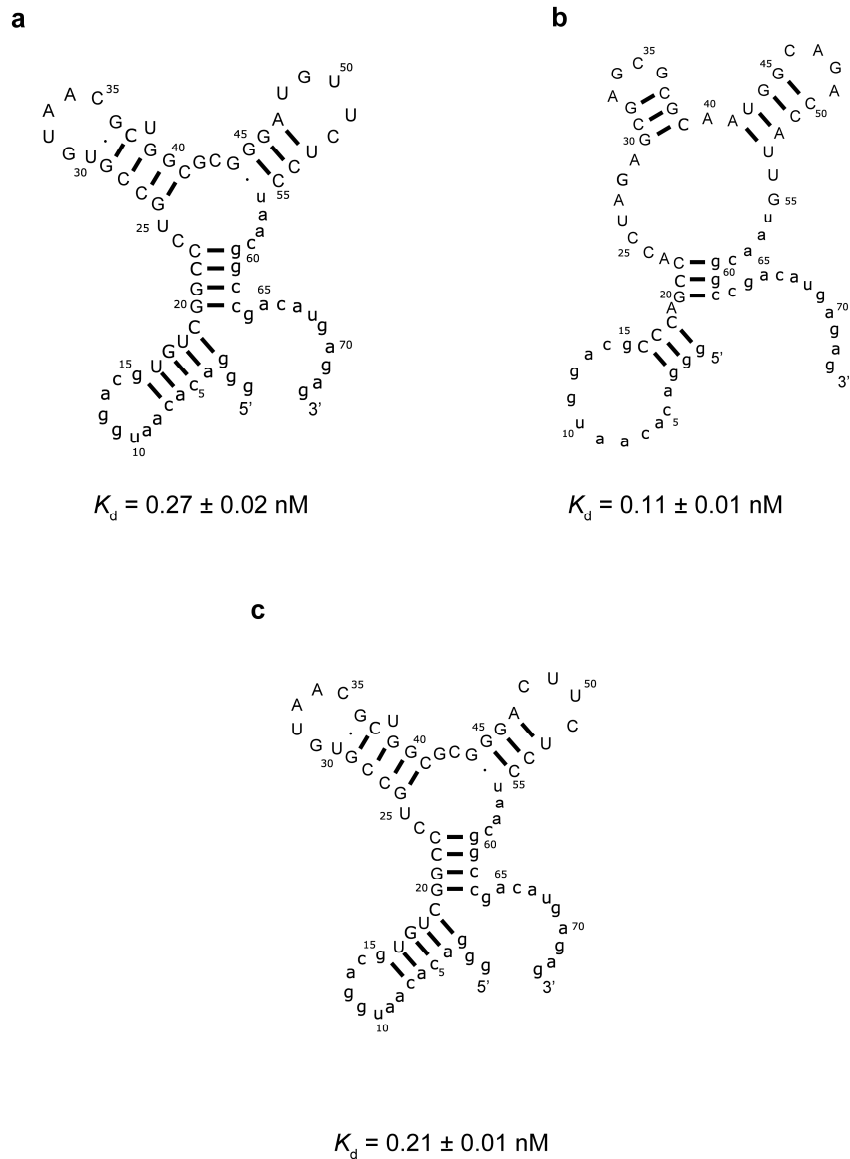

**Supplementary Figure S4. The predicted secondary structures and  $K_d$  values of S1, S2, and S3.**

The secondary structures of S1 (**a**), S2 (**b**), and S3 (**c**) were predicted using vs\_subopt.<sup>1, 2</sup>

Lower-case letters indicate nucleotides derived from the primer-binding sequences. The  $K_d$  values were previously reported.<sup>3</sup>

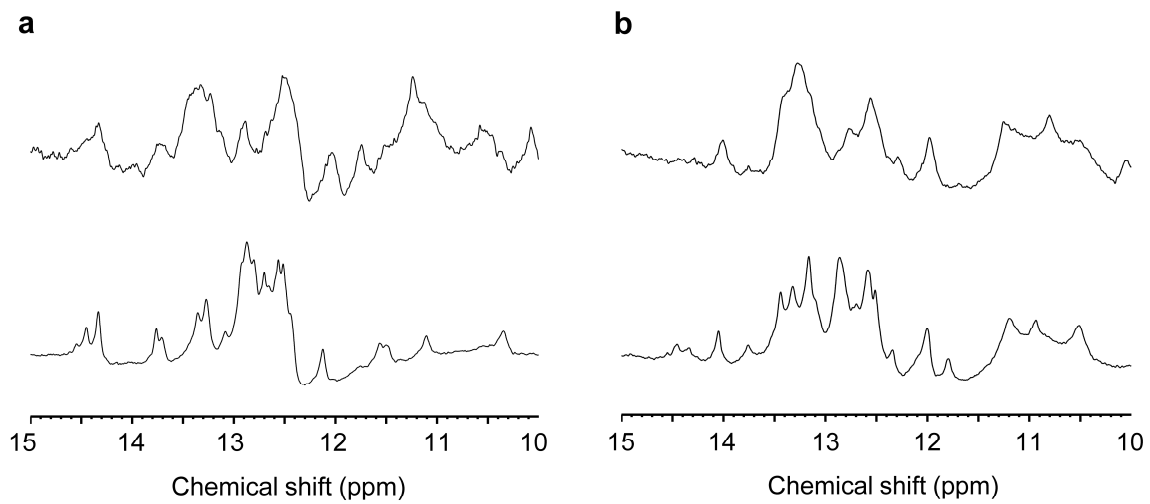

**Supplementary Figure S5. Comparison of 1D imino proton spectra of S1 and S2 in the absence and presence of RD.** 1D imino proton spectra of S1 (a) and S2 (b) in the absence (bottom) and presence (top) of RD.

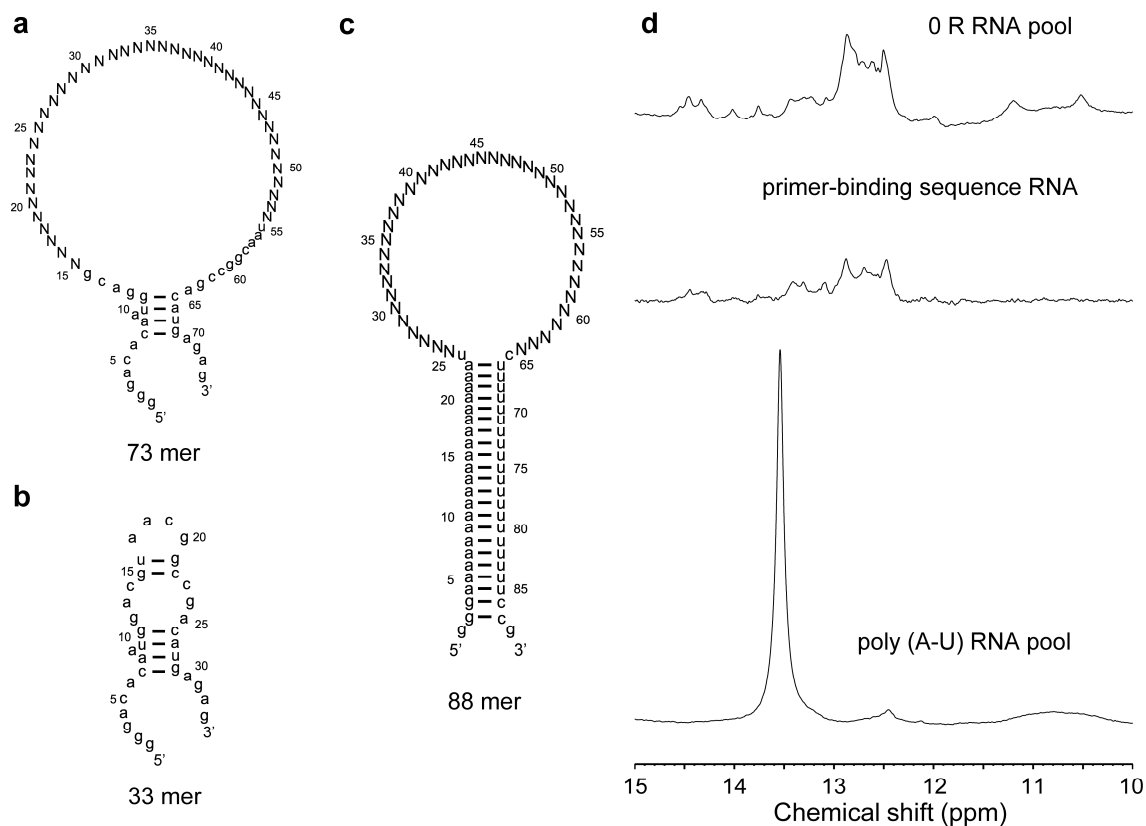

**Supplementary Figure S6. Comparison of 1D imino proton spectra between the 0R RNA pool, RNA primer-binding sequences, and poly (A-U) RNA pool.** The predicted secondary structure of the 0R RNA pool (a), primer-binding sequences RNA (b), and poly (A-U) RNA pool (c). Lower-case letters indicate nucleotides derived from the primer-binding sequences. 1D imino proton spectra of the 0R RNA pool (top), primer-binding sequence RNA (middle), and (A-U) RNA pool (bottom) (d).

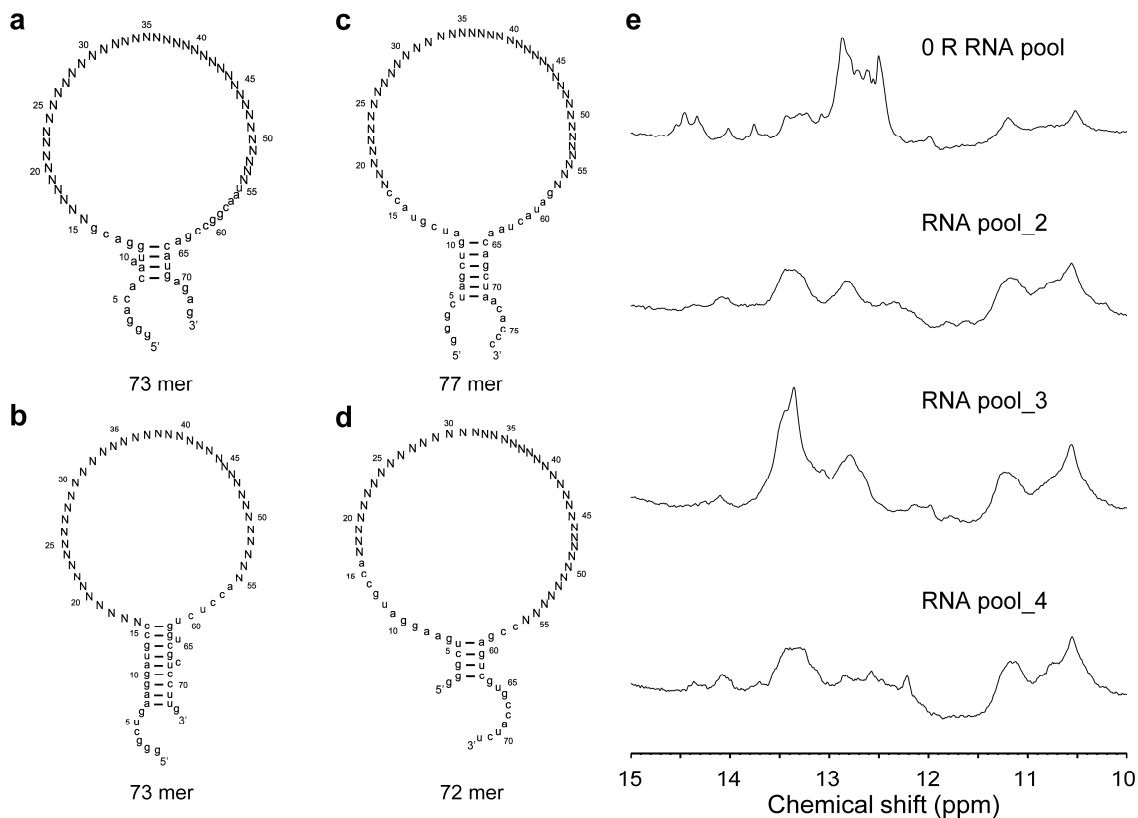

**Supplementary Figure S7. Comparison of 1D imino proton spectra between various 0R RNA pools.** The predicted secondary structure of the 0R RNA pool (a), RNA pool\_2 (b), RNA pool\_3 (c), and RNA pool\_4 (d). Lower-case letters indicate nucleotides derived from the primer-binding sequences. 1D imino proton spectra of the 0R RNA pool (top), RNA pool\_2 (second from top), RNA pool\_3 (third from top), and RNA pool\_4 (bottom) (e).



## References

1. Dawson, W., Fujiwara, K., Futamura, Y., Yamamoto, K. & Kawai, G. A method for finding optimal RNA secondary structures using a new entropy model (vsfold). *Nucleosides Nucleotides Nucl. Acids* **25**, 171–189 (2006).
2. Dawson, W., Takai, T., Ito, I., Shimizu, K. & Kawai, G. A new entropy model for RNA: part III, Is the folding free energy landscape of RNA funnel shaped? *Journal of Nucleic Acids Investigation* **5**, 2652 (2014).
3. Amano, R. et al. Kinetic and Thermodynamic Analyses of Interaction between a High-Affinity RNA Aptamer and its Target Protein. *Biochemistry* **55**, 6221-6229 (2016).
